# Supplementary material for: A multifunctional black phosphorus-based adhesive patch intrinsically induces partial EMT for effective burn wound healing
Source: Royal Society of Chemistry journal article supplement (doi:10.1039/d2bm01625g), 2022-11-18
Supplement: d2bm01625g1.pdf [file d2bm01625g1.pdf]

## Electronic Supplementary Information (ESI)

# A Multifunctional Black Phosphorus Based Adhesive Patch Intrinsically Induces Partial EMT for Effective Burn Wound Healing

Xiaomeng Wang<sup>‡a</sup>, Xiaoduo Tang<sup>‡a,b,c</sup>, Nuo Li<sup>a</sup>, Yihan Sun<sup>b,c</sup>, Ruotong Yu<sup>a</sup>, Junhu Zhang<sup>\*b,c</sup>, Daowei Li<sup>\*a</sup>, Bai Yang<sup>b,c</sup>, and Hongchen Sun<sup>a</sup>

a Jilin Provincial Key Laboratory of Oral Biomedical Engineering, School and Hospital of Stomatology, Jilin University, Changchun, 130021, P. R. China. E-mail: jluldw@jlu.edu.cn.

b State Key Laboratory of Supramolecular Structure and Materials, College of Chemistry, Jilin University, Changchun 130012, P. R. China. E-mail: zjh@jlu.edu.cn.

c Joint Laboratory of Opto-Functional Theranostics in Medicine and Chemistry, The First Hospital of Jilin University, Changchun 130021, P. R. China

‡ These authors contributed equally to this work.

**Table S1.** Primers used for real-time RT-PCR.

| Primers' sequences (5' - 3') |                          |                          |
|------------------------------|--------------------------|--------------------------|
| Target gene                  | Forward                  | Reverse                  |
| CDH1                         | CCCATCAGCTGCCAGAAAATGAA  | CTGTCACCTTCAGCCATCCTGTTT |
| CK                           | ACTACCTGCAGCCGCCAGTT     | CAGTTCTTGGTGC GA-AGGAC   |
| CDH2                         | CAACTTGCCAGAAA ACTCCAGG  | ATGAAACCGGGCTATCTGCTC    |
| Vim                          | GACAATGCGTCTCTGGCACGTCTT | TCCTCCGCCTCCTGCAGGTTCTT  |
| Snail1                       | GGTTCTTCTGCGCTACTGCTG    | GTCGTAGGGCTGCTGGAAGG     |
| GAPDH                        | GTGAAGGTCGGAGTCAACGGATT  | CACAGTCTTCTGGGTGGCAGT    |

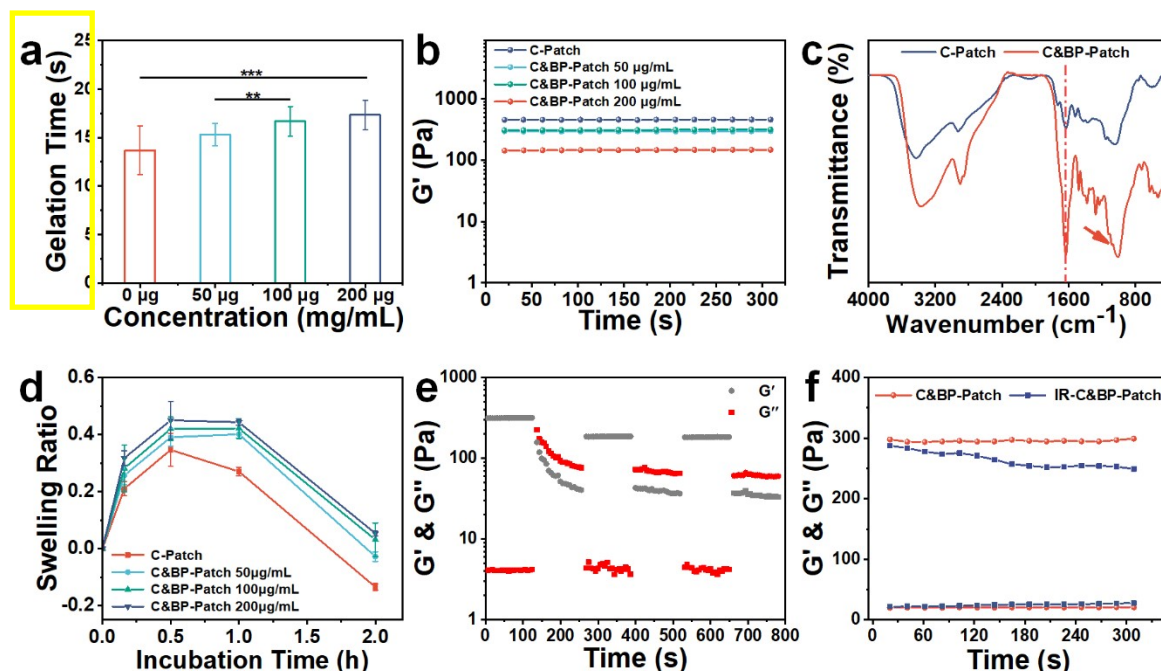

**Figure S1.** Characterizations of C&BP-Patch. a) Gelation time of the C&BP-Patch at different concentrations of BPNS (the concentration of BPNS was 0, 50, 100, and 200  $\mu\text{g/mL}$ ). b) Storage modulus ( $G'$ ) of C-Patch and C&BP-Patch scaffolds. c) FT-IR spectra of the C-Patch and C&BP-Patch. d) The swelling property of hydrogels. (i.e., in phosphate buffered saline at 37  $^{\circ}\text{C}$ ). e) Rheological behavior of hydrogels. The storage modulus ( $G'$ ) and loss modulus ( $G''$ ) of C-Patch and C&BP-Patch. f) Rheological behavior of hydrogels with NIR irradiation. The storage modulus ( $G'$ ) and loss modulus ( $G''$ ) of C&BP-Patch.

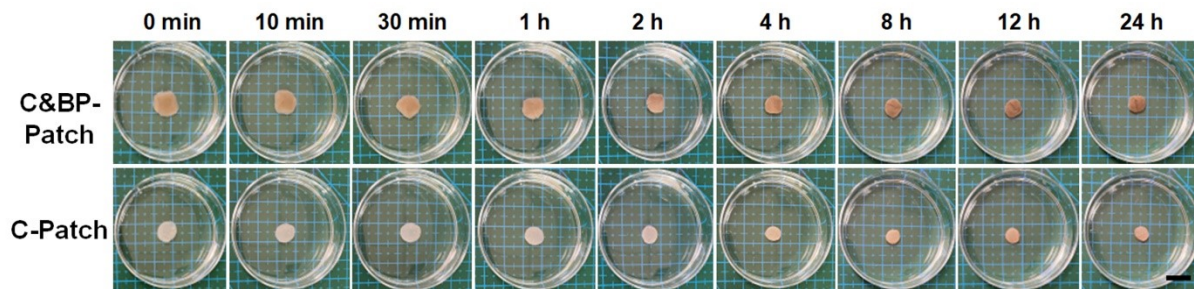

**Figure S2.** Swelling properties of the C-Patch and C&BP-Patch. Scale bar: 2 cm.

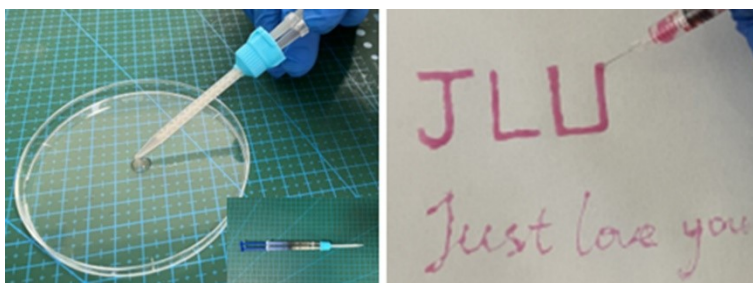

**Figure S3.** Evaluation of injectability of the C&BP-Patch with a double barrel spiral needle. The injection process of a hybrid hydrogel. The C&BP-Patch can pass through the needle (29 G), then JLU (Just love you) was drawn.

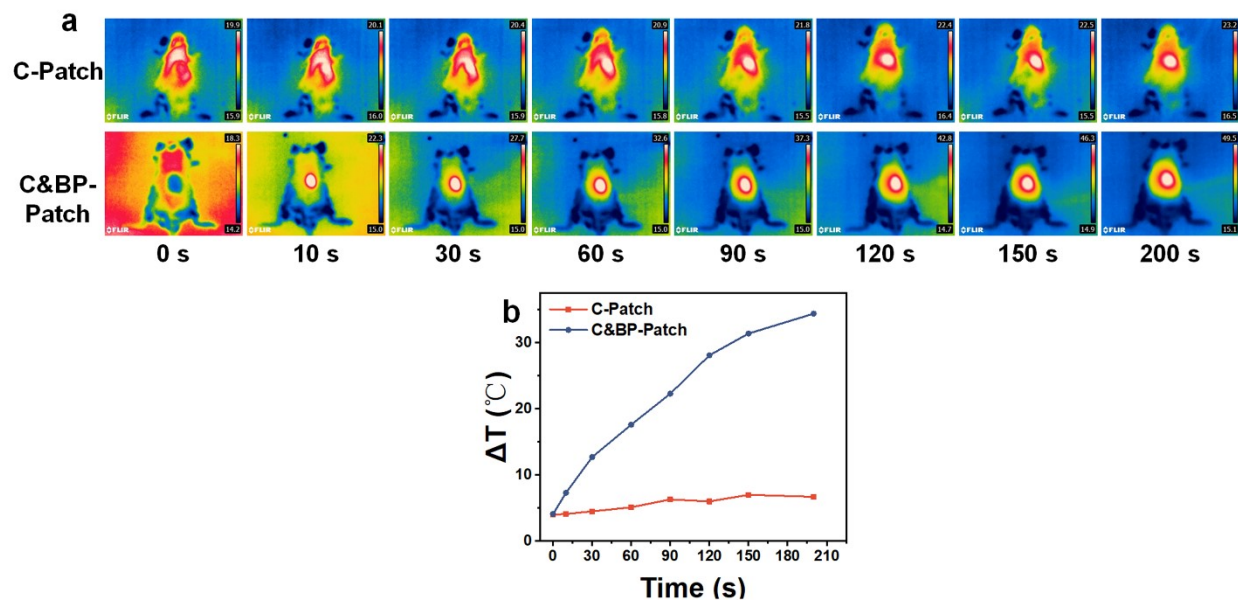

**Figure S4.** Temperature variation of skin wound surface. a) Thermal images and b) temperature curves of C-Patch and C&BP-Patch under NIR irradiation *in vivo*.

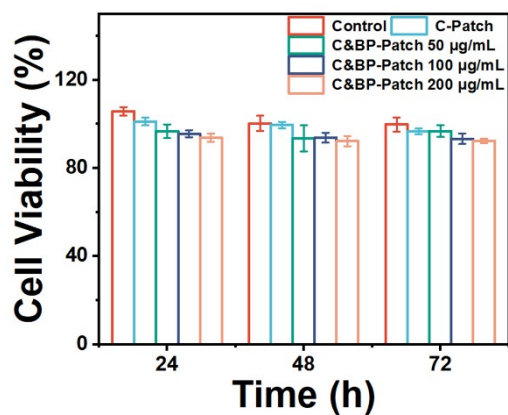

**Figure S5.** Cell viability of the C&BP-Patch at different concentrations of BPNS at 24 h, 48 h, and 72 h.

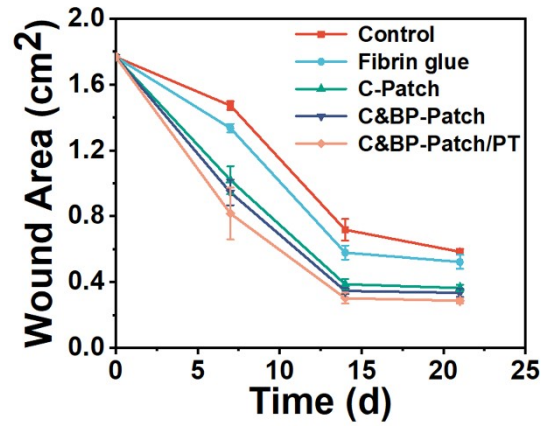

**Figure S6.** Wound areas of mice skin burn at 7 d, 14 d and 21 d.

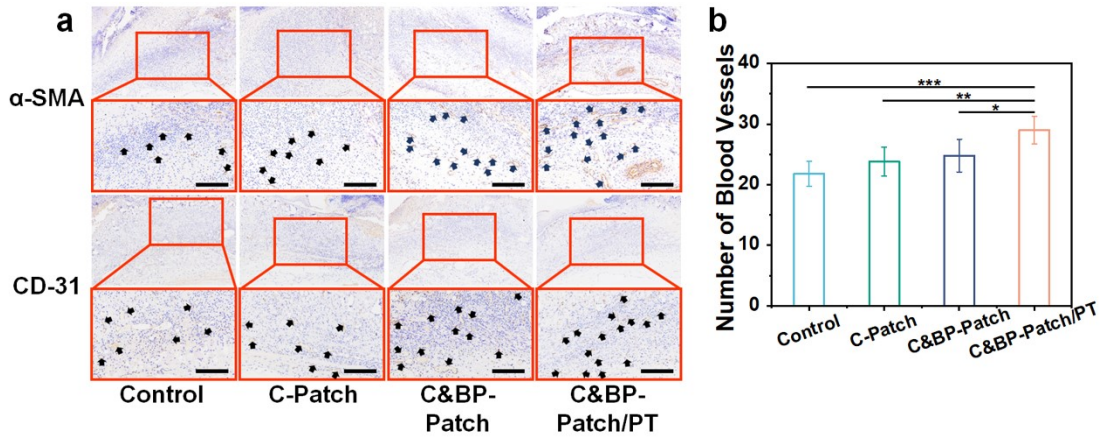

**Figure S7.** The C&BP-Patch promoted angiogenesis in cutaneous infectious burn wounds. a) and b) IHC staining of vascular markers ( $\alpha$ -SMA and CD31) and number of blood vessels in different groups. Scale bar: 100  $\mu$ m.

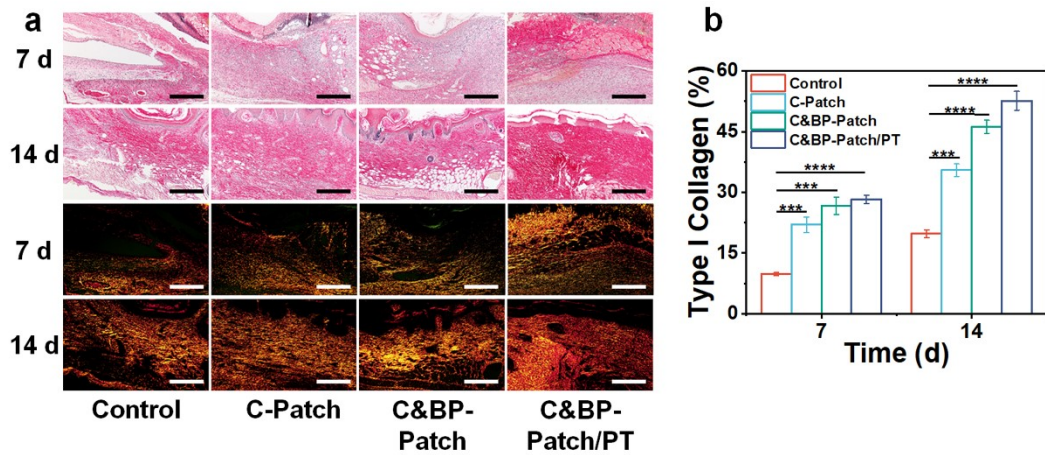

**Figure S8.** The C&BP-Patch promoted the deposition of collagen in cutaneous infectious burn wounds. a) Sirius red staining of skin burns on day 7 and day 14. The type III collagen fibers were green and the type I collagen fibers were bright yellow or red. Scale bar: 400  $\mu\text{m}$ . b) Content of type I collagen in mice skin burns.

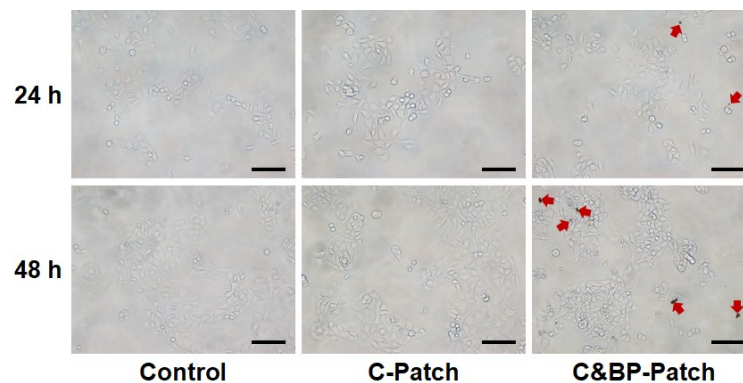

**Figure S9.** Cell co-cultured with C-Patch the C&BP-Patch at 24 h and 48 h. Red Arrow: BPNS contained in C&BP-Patch. Scale Bar: 200  $\mu\text{m}$ .

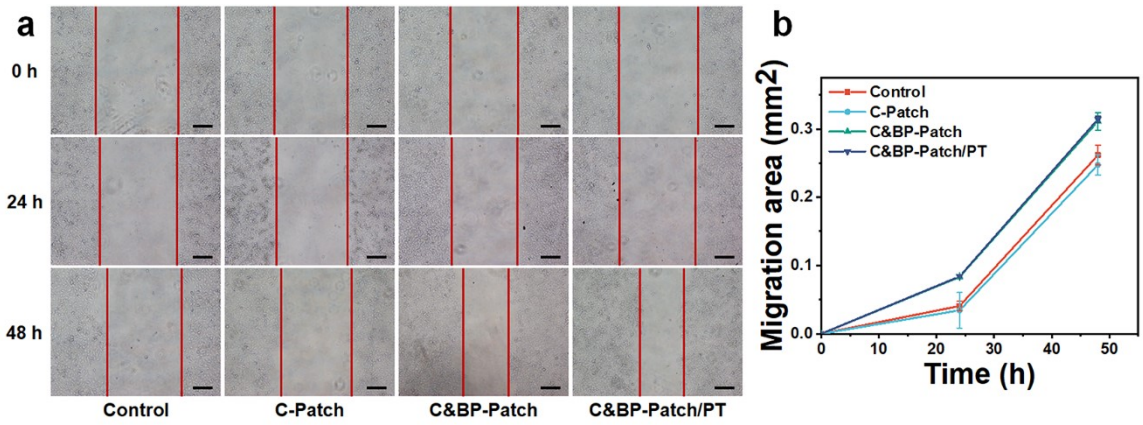

**Figure S10.** Cell migration *in vitro*. a) Cell motility of HaCaT cells treated with C-Patch, C&BP-Patch and C&BP-Patch/PT by scratch assay and observed by microscopy. Scale bar: 200  $\mu$ m. b) Migration area of HaCaT cells cultured with C-Patch, C&BP-Patch and C&BP-Patch/PT.

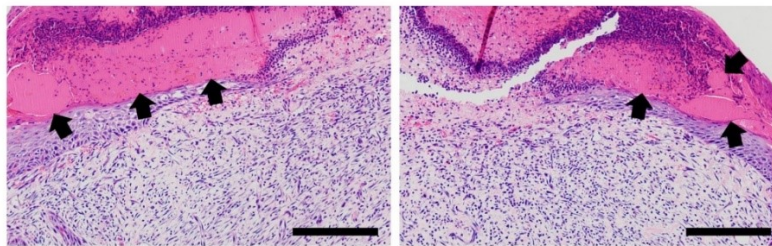

**Figure S11.** The hydrogels remained and mixed with eschar at 7 d *in vivo*. Black arrows: the remaining hydrogels. Scale Bar: 200  $\mu$ m.

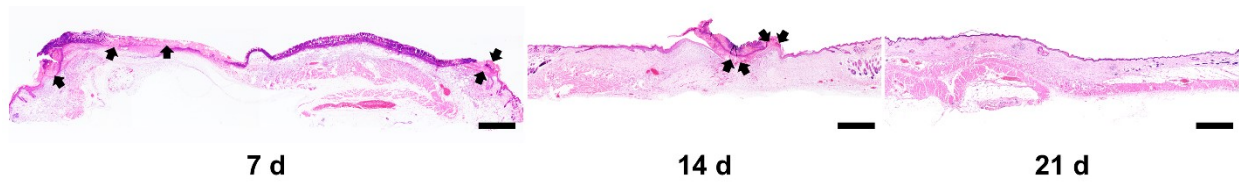

**Figure S12.** The hydrogels degraded on burn wounds within 14 d. Black arrows: The remaining hydrogels. Scale Bar: 1 mm.
