# Supplementary figures and images for: A multifunctional black phosphorus-based adhesive patch intrinsically induces partial EMT for effective burn wound healing
Source: Royal Society of Chemistry journal article supplement (doi:10.1039/d2bm01625g), 2022-11-18

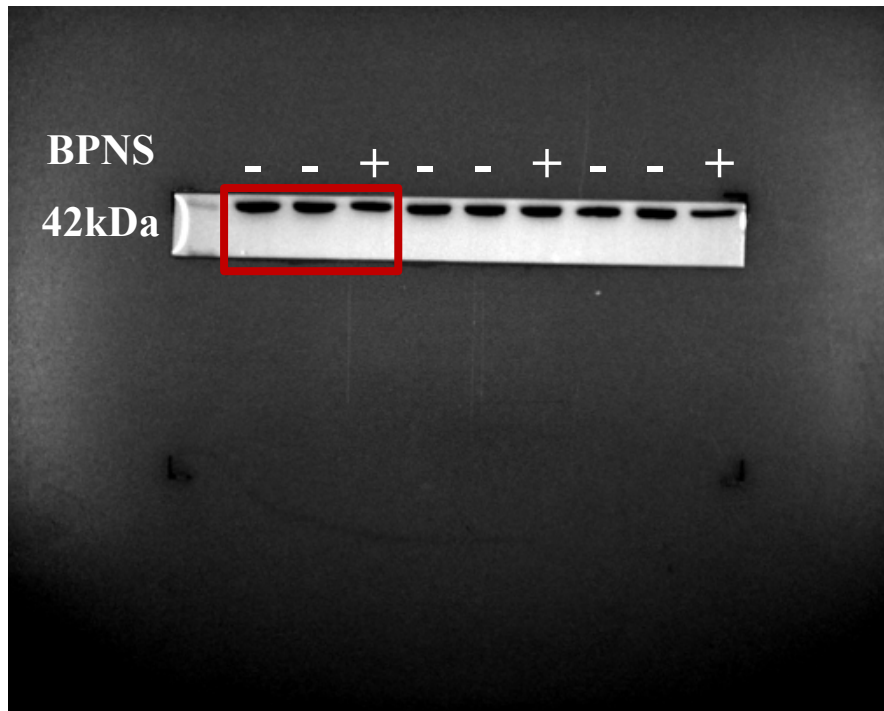

$\beta$ -actin

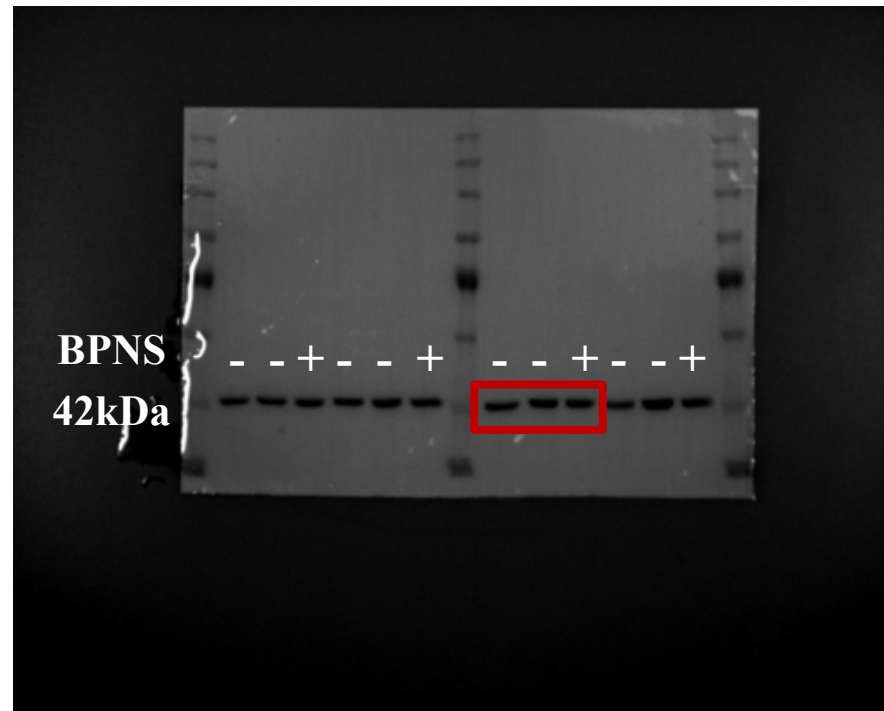

$\beta$ -actin

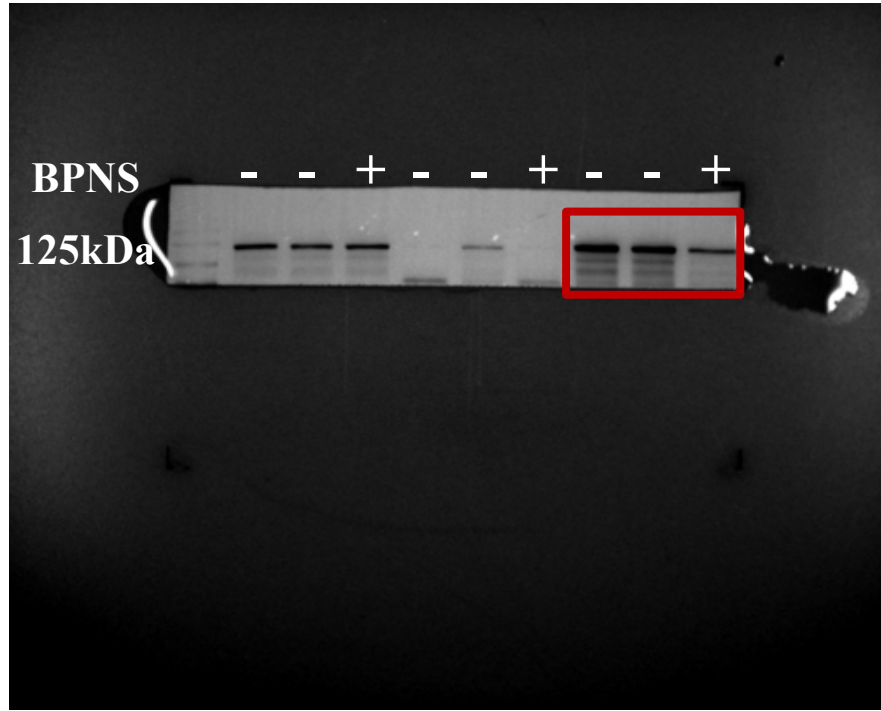

**CDH1**

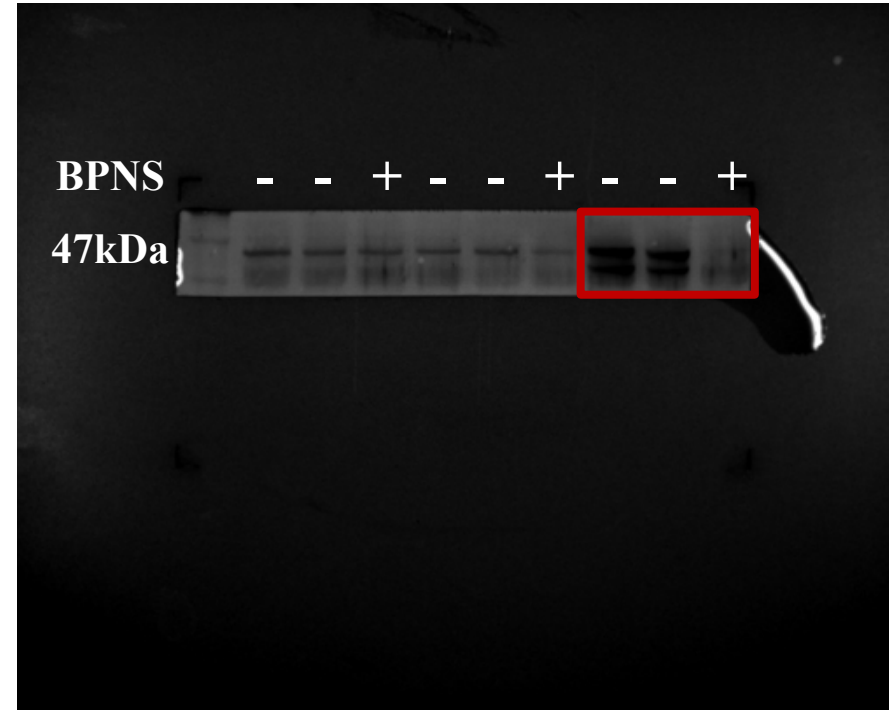

**CK**

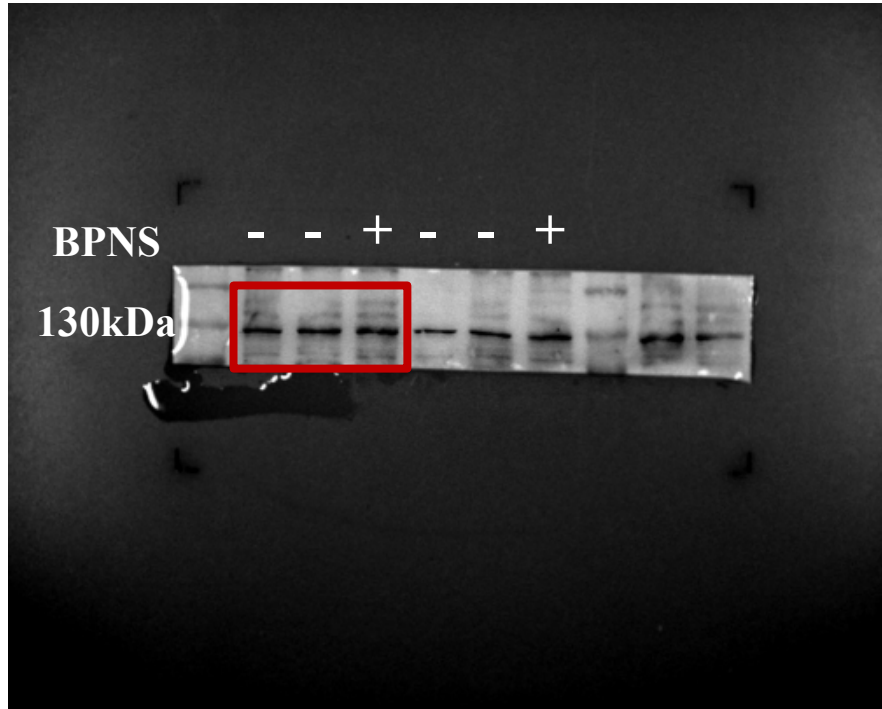

**CDH2**

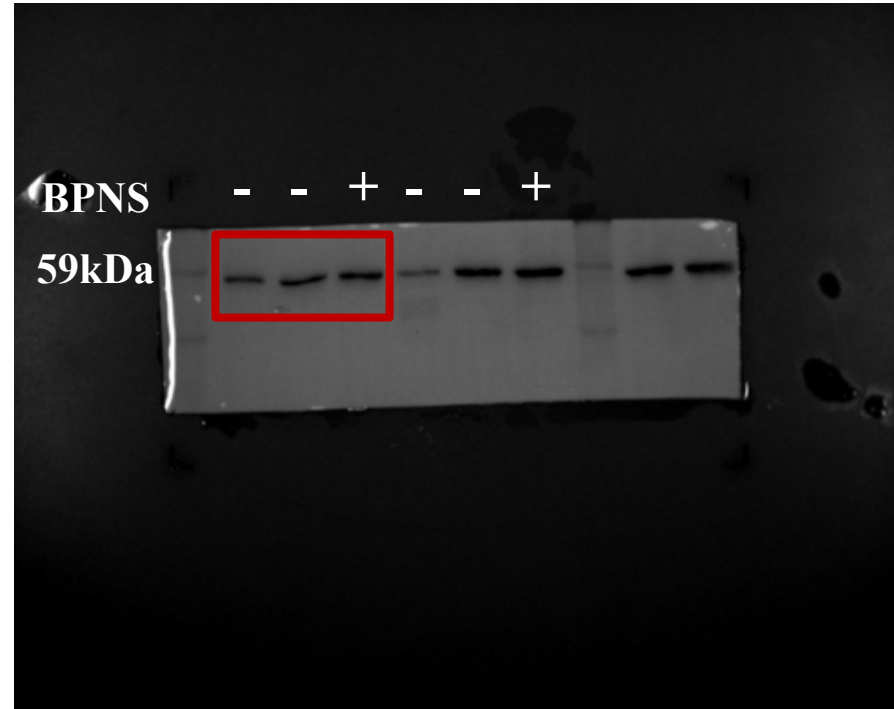

**Vim**

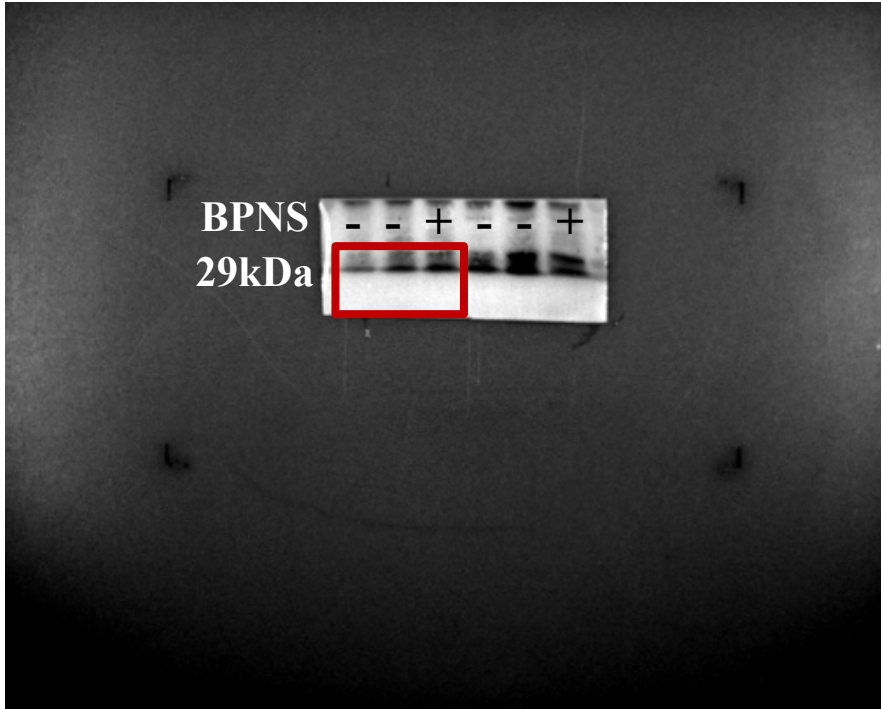

**Snail1**

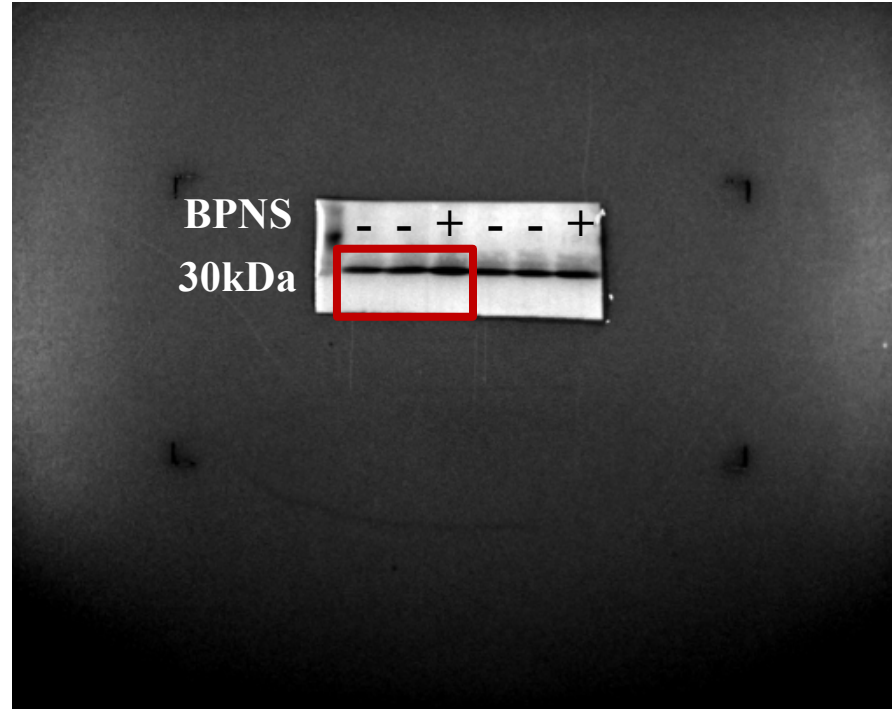

**Slug**

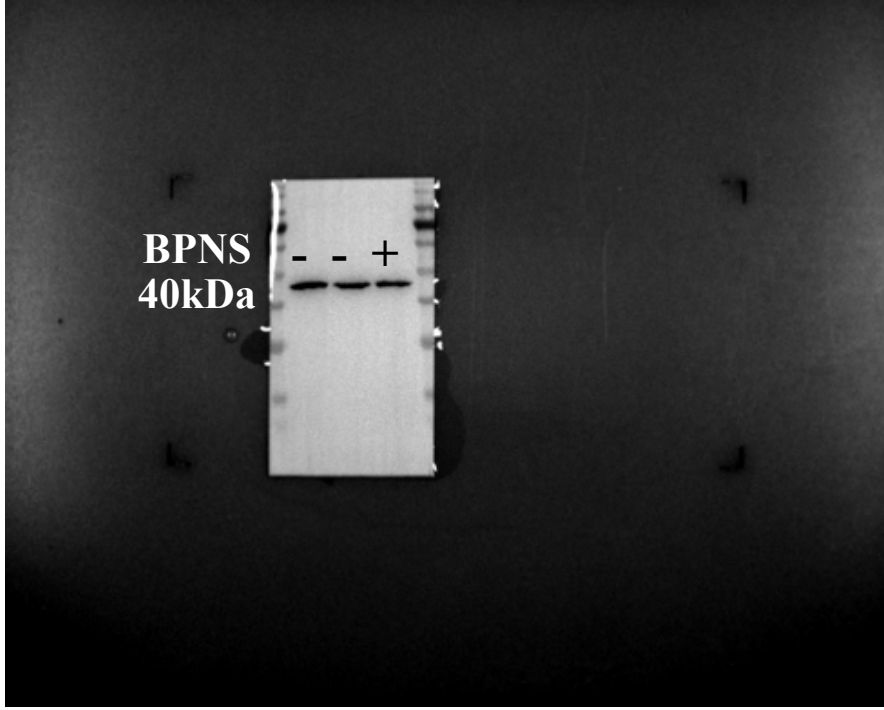

**p38**

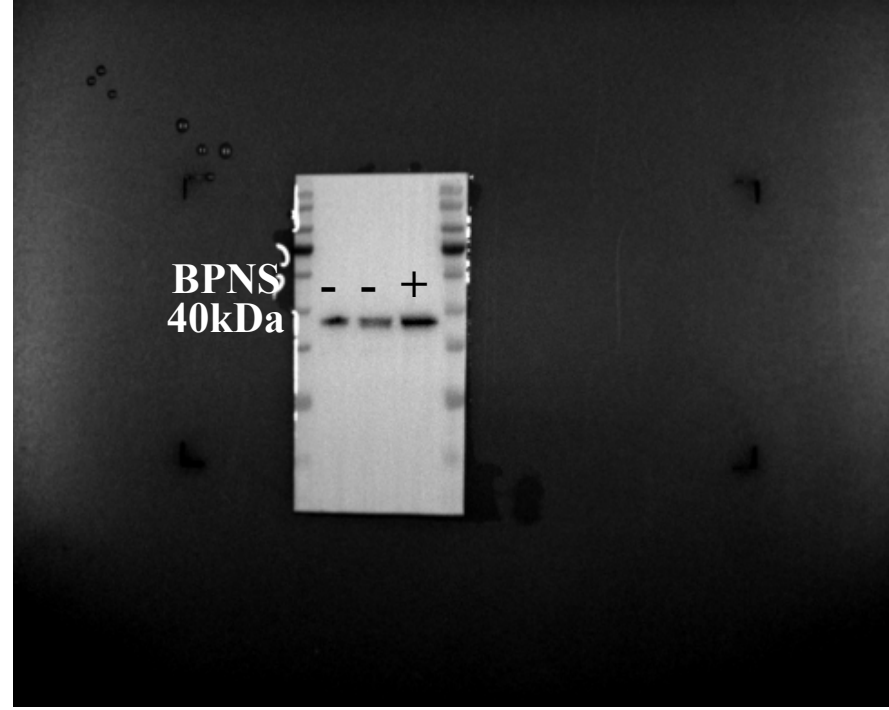

**p-p38**

Supplement: d2bm01625g2.pdf [file d2bm01625g2.pdf]
